# Supplementary material
Source: PubMed Central journal article supplement (PMC4944530)
Supplement: mmc1.pdf [file mmc1.pdf]

**Biophysical Journal, Volume 111**

**Supplemental Information**

**The Role of Cholesterol in Driving IAPP-Membrane Interactions**

**Michele F.M. Sciacca, Fabio Lolicato, Giacomo Di Mauro, Danilo Milardi, Luisa D'Urso, Cristina Satriano, Ayyalusamy Ramamoorthy, and Carmelo La Rosa**

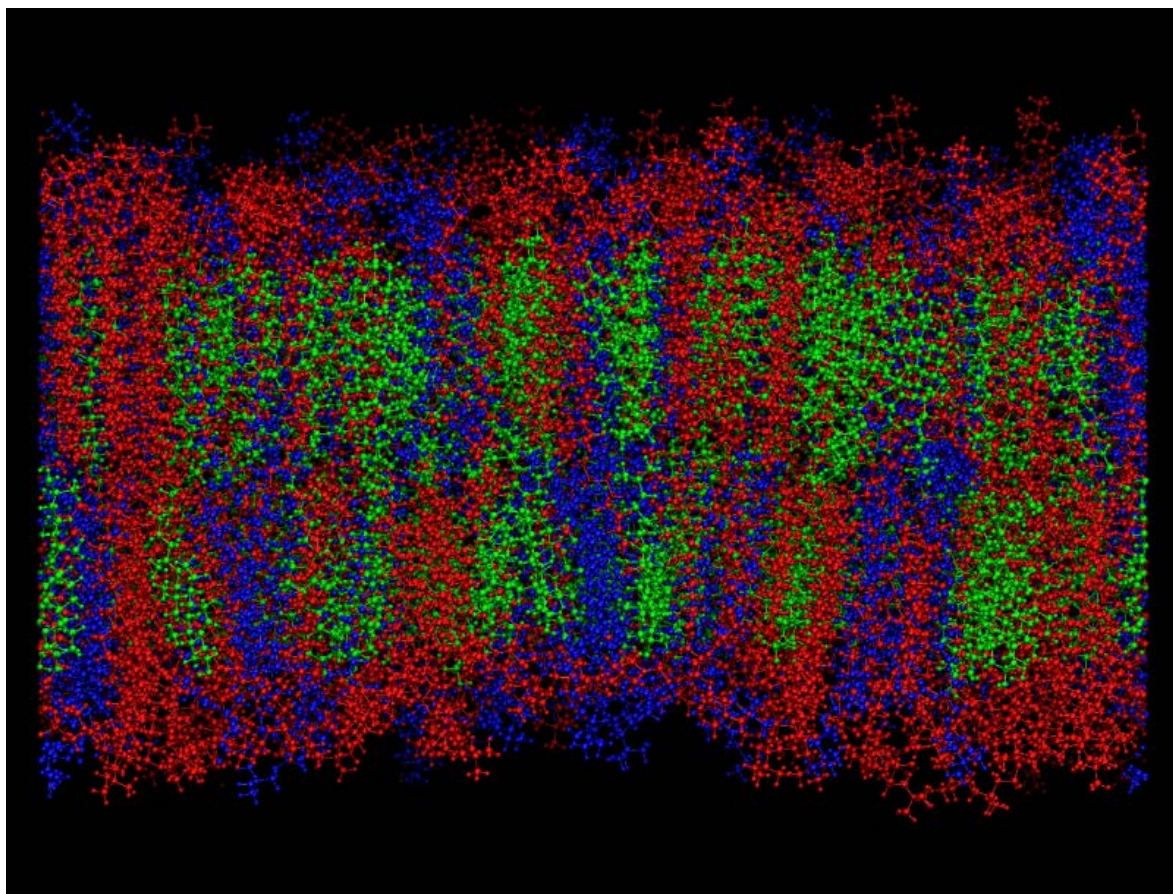

Figure S1. Location of cholesterol in a lipid bilayer obtained after 300 ns molecular dynamics simulation of DPPC/DOPC containing 40% of cholesterol.

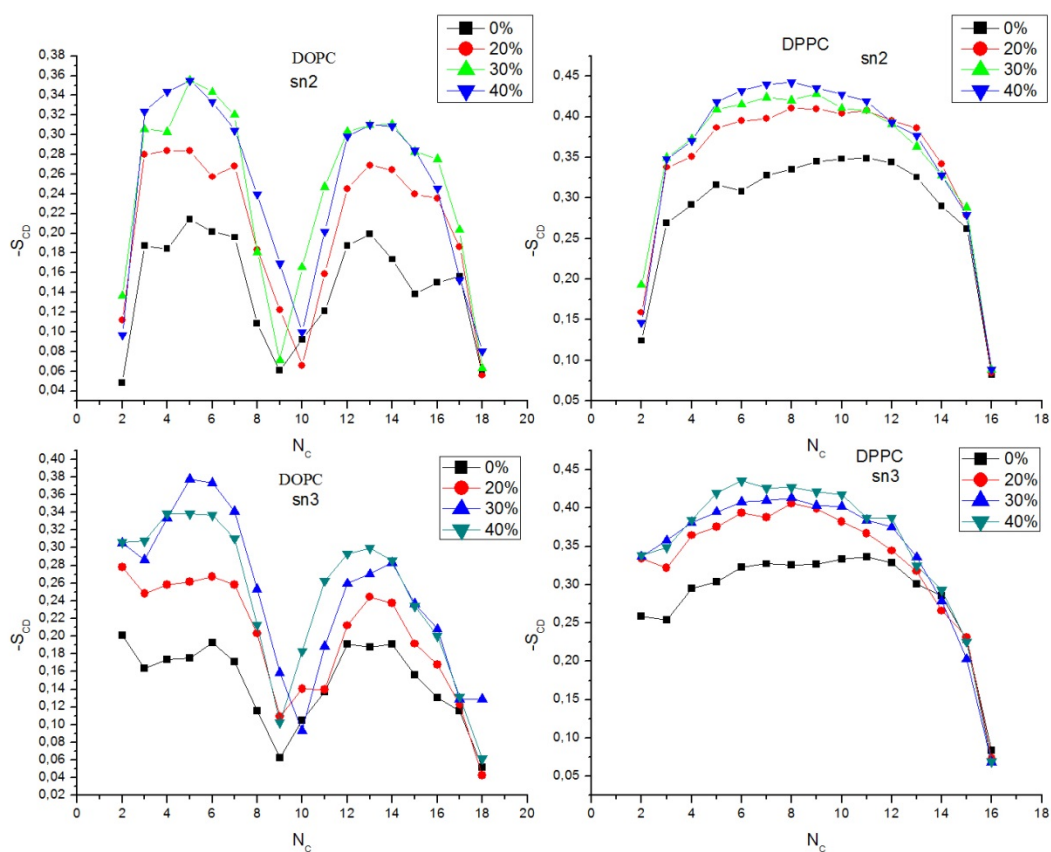

Figure S2. Order parameters ( $-S_{CD}$ ) of DOPC/DPPC/Cholesterol lipid bilayers calculated from MD simulations.  $S_{CD}$  was evaluated as averaged over last 50 ns of simulations by taking both leaflets into account. DOPC carbon-carbon double bond of sn2 (black) and sn3 (red) hydrocarbon chains are between C9-C10.

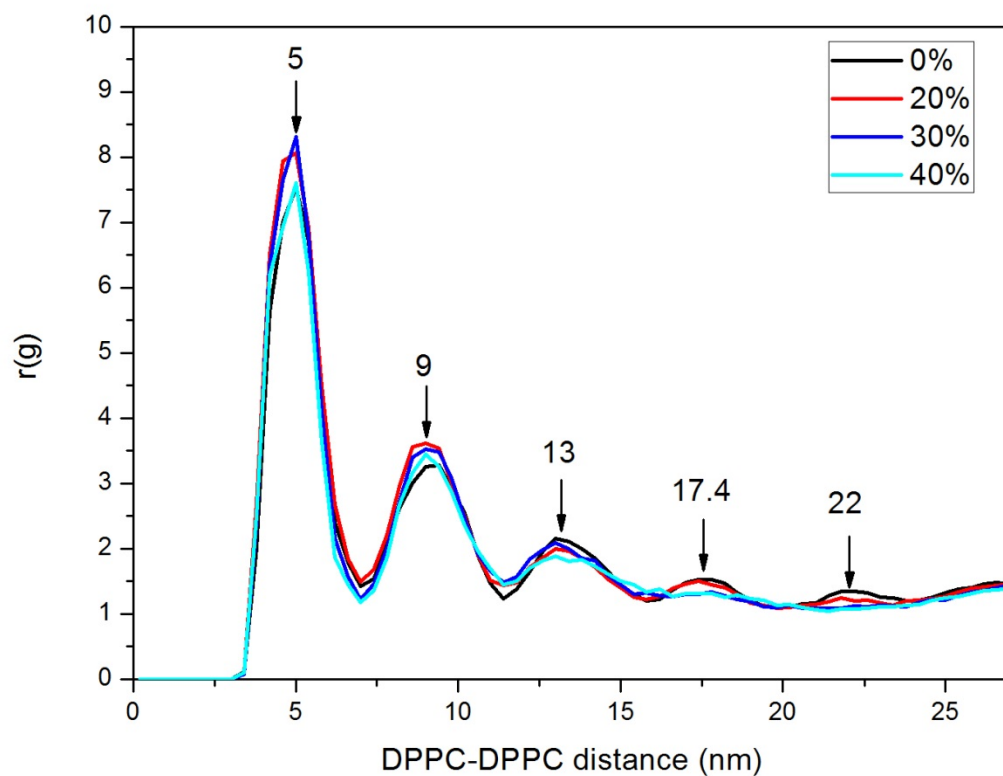

Figure S3. Radial distribution function of DPPC in mixture with DOPC and a varying amount of cholesterol: 0% black; 20% red; 30% blue and 40% cyan.  $R(g)$  was calculated for C8 carbon atom of DPPC-DPPC.

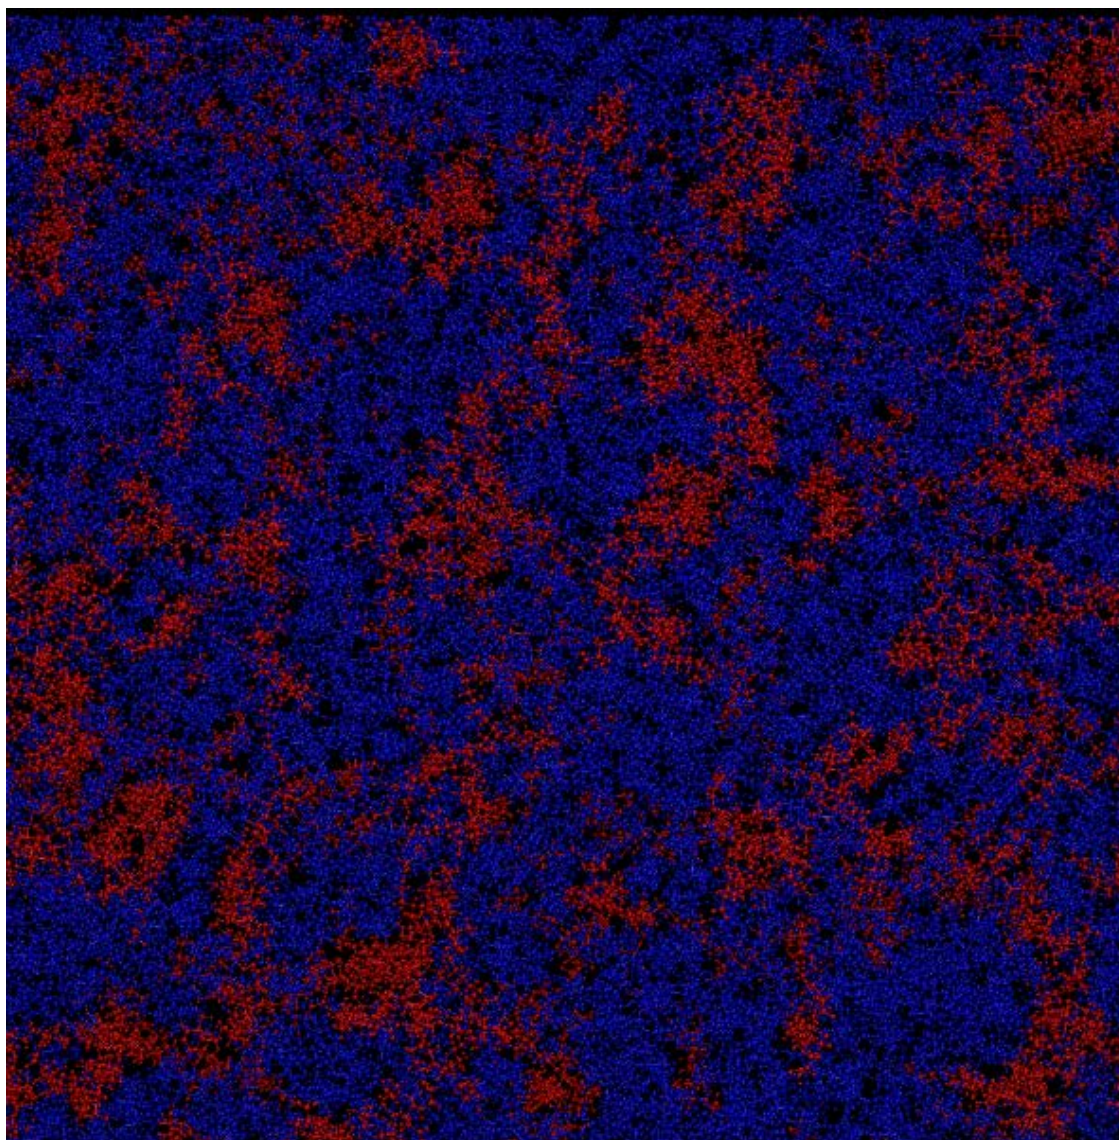

Figure S4. Top view of phospholipid distribution in aDOPC:DOPS (7:3) lipid bilayers after 300 ns of molecular dynamic simulations.

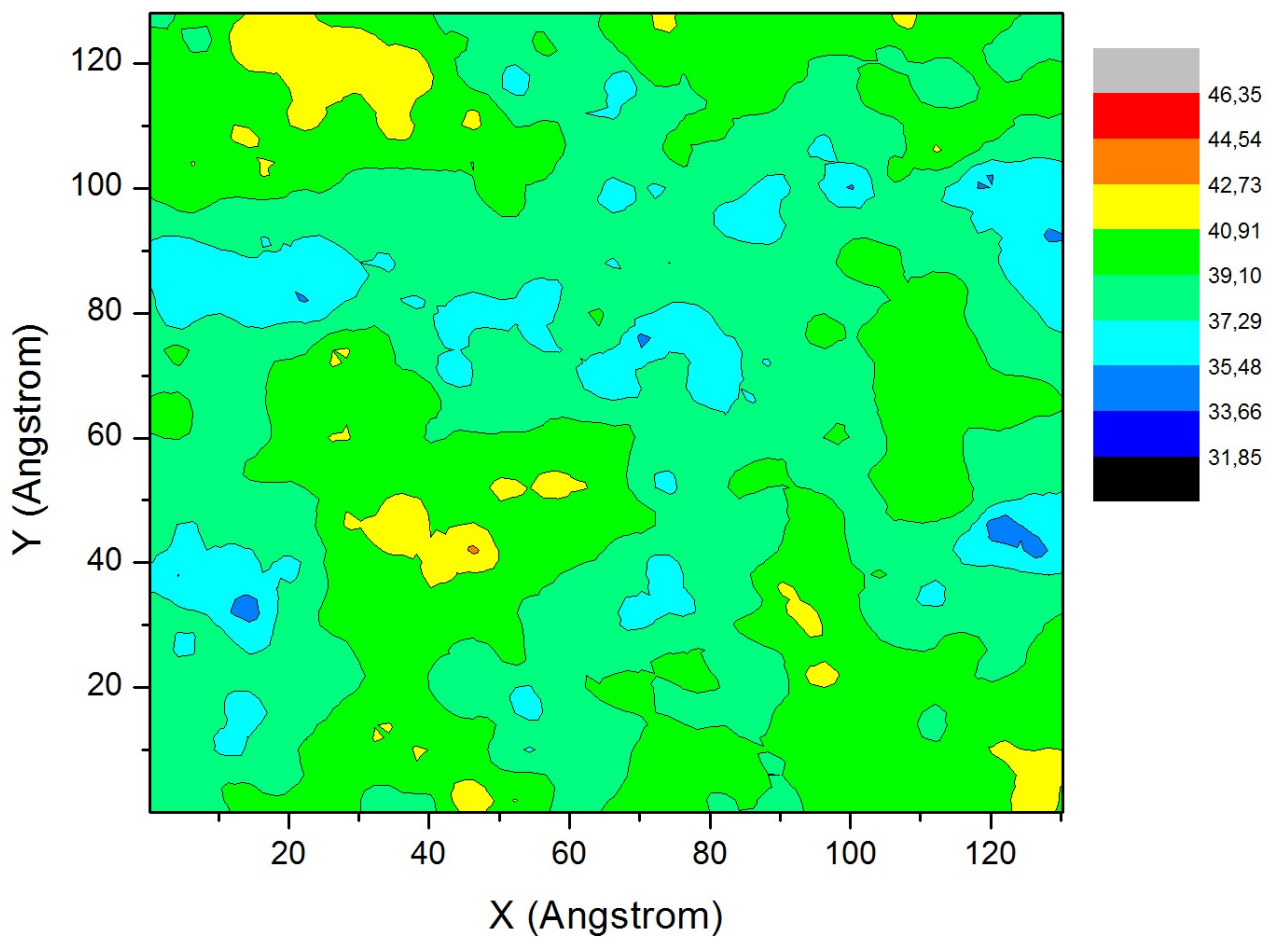

Figure S5. Thickness profile of DOPC:DOPS (7:3) lipid bilayers after 300 ns of molecular dynamic simulations.
